# Supplementary material for: Transcriptional Factor Yin Yang 1 Promotes the Stemness of Breast Cancer Cells by Suppressing miR-873-5p Transcriptional Activity
Source: PubMed Central journal article supplement — Mol Ther Nucleic Acids. 2020 Jun 24;21:527–41. doi: 10.1016/j.omtn.2020.06.018 (PMC7381513; doi:10.1016/j.omtn.2020.06.018), 2020-06-24
Supplement: mmc1.pdf [file mmc1.pdf]

OMTN, Volume 21

## **Supplemental Information**

### **Transcriptional Factor Yin Yang 1 Promotes the Stemness of Breast Cancer Cells by Suppressing miR-873-5p Transcriptional Activity**

**Qianqian Guo, Ting Wang, Yue Yang, Lanlan Gao, Qiong Zhao, Wenzhou Zhang, Tao Xi, and Lufeng Zheng**

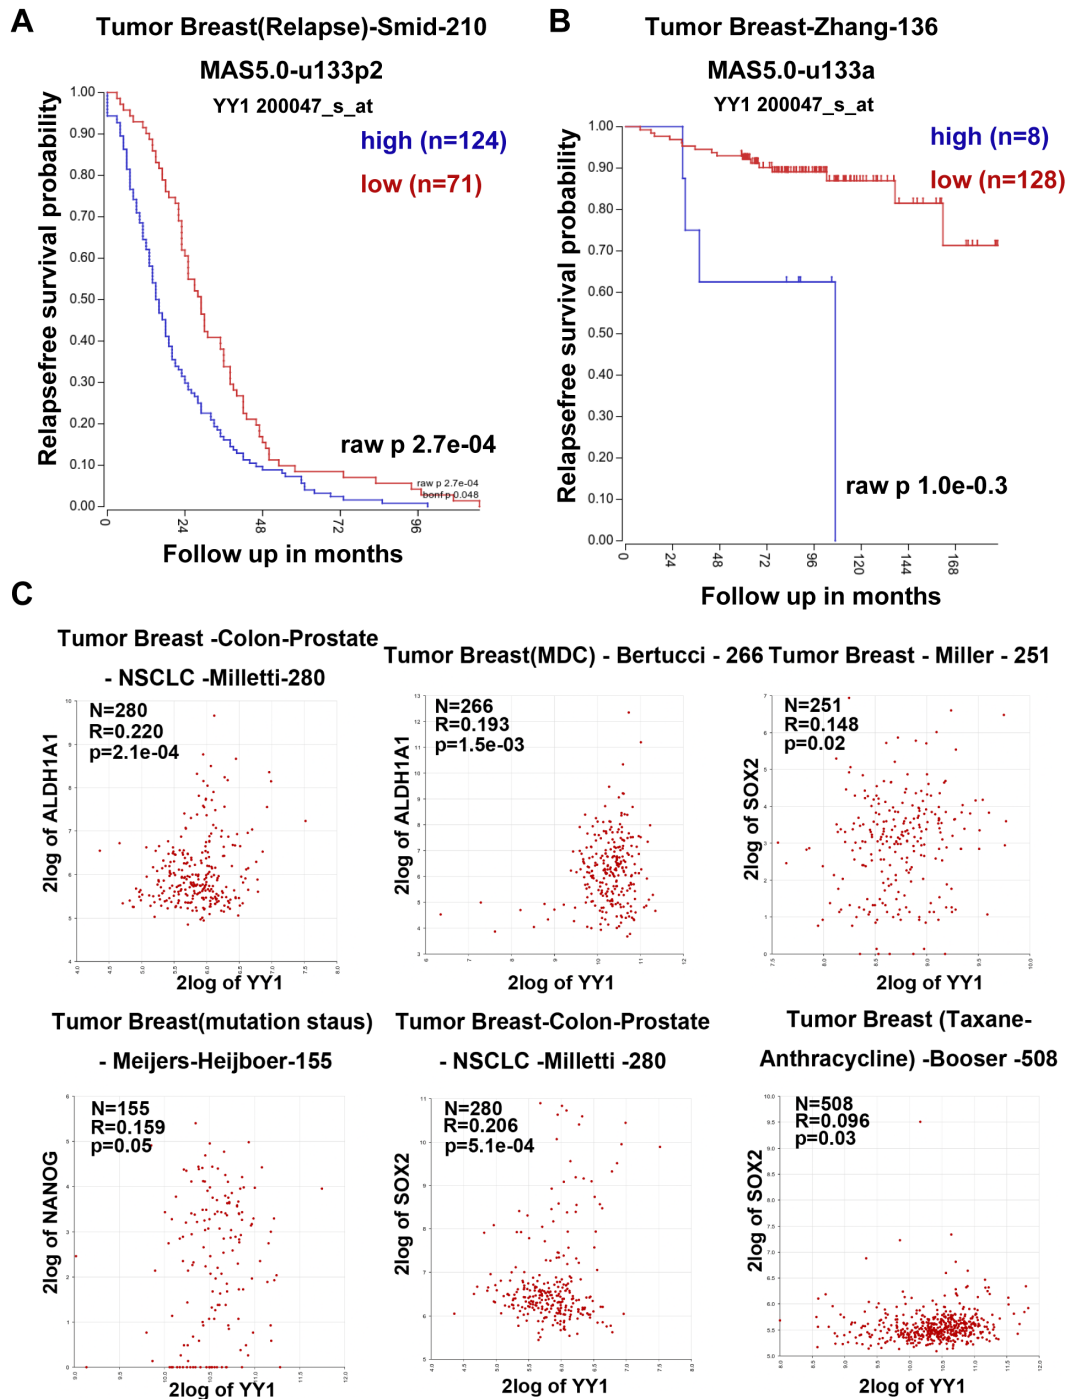

**Figure S1** YY1 was positively correlated with the expression of stemness markers in breast cancer tissues via online database. (A and B) Correlation between YY1 expression and relapse free survival of breast cancer patients based on KM-Plotter analysis. (C) Correlation between YY1 expression and the expression of ALDH1A1, SOX2, NANOG in breast tumor tissues.

### A Expression of YY1 in BRCA based on breast cancer subclasses

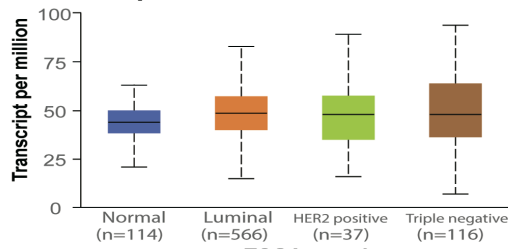

| Comparison               | Statistical significance |
|--------------------------|--------------------------|
| Normal-vs-Luminal        | 4.0219999971486E-08      |
| Normal-vs-HER2 Positive  | 1.215400E-01             |
| Normal-vs-TNBC           | 1.448600E-04             |
| Luminal-vs-HER2 Positive | 5.651800E-01             |
| Luminal-vs-TNBC          | 3.391800E-01             |
| HER2 Positive-vs-TNBC    | 3.690800E-01             |

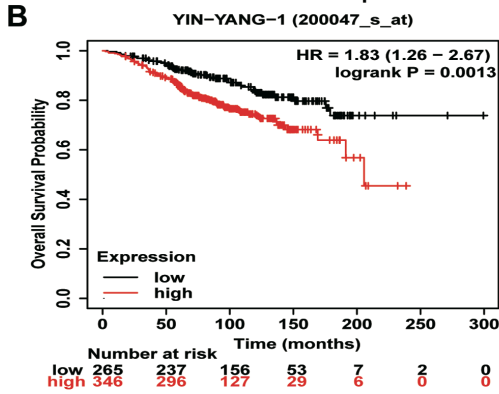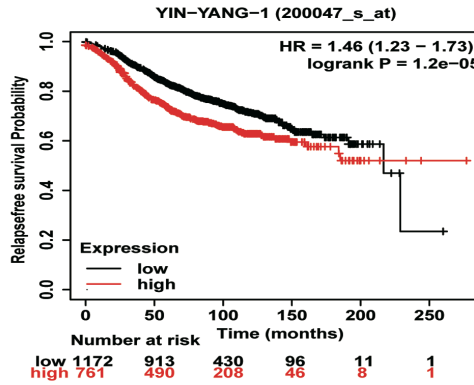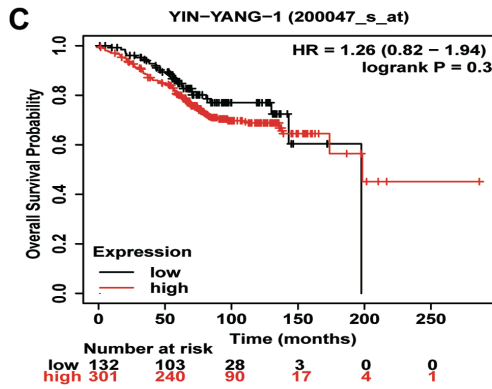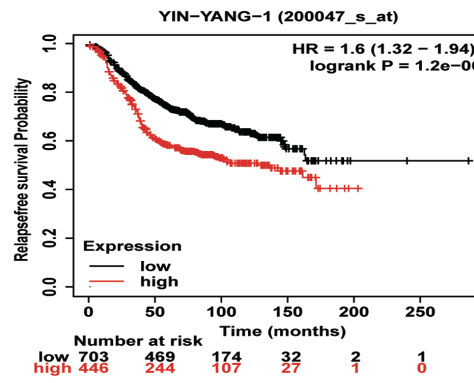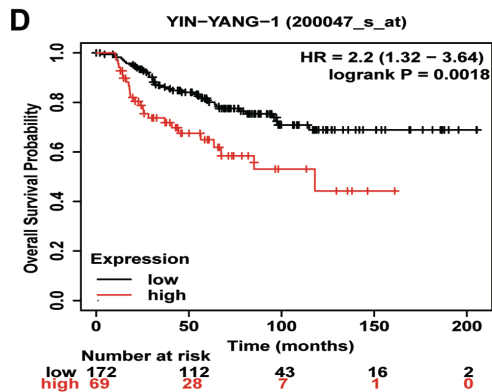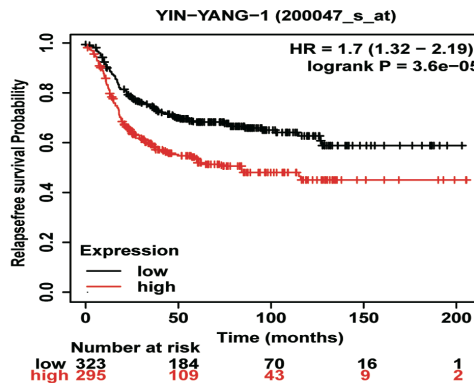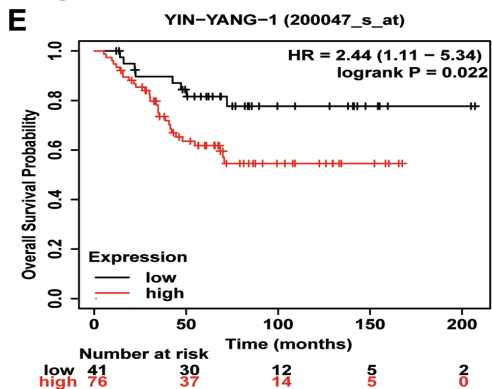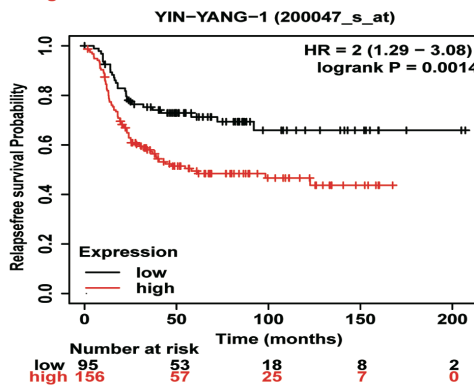

**Figure S2 The level of YY1 and the relationship between YY1 overexpression with patient survival in the four major breast cancer molecular subtypes. (A)** The expression of YY1 in the four subtypes of basic breast cancer and normal breast cancer tissues via online clinical posted date. **(B-E)** Correlation between YY1 overexpression with overall survival (**left**) and relapse free survival (**right**) for Luminal A **(B)**, Luminal B **(C)**, base-like **(D)** and HER2 **(E)** on KM-Plotter analysis.

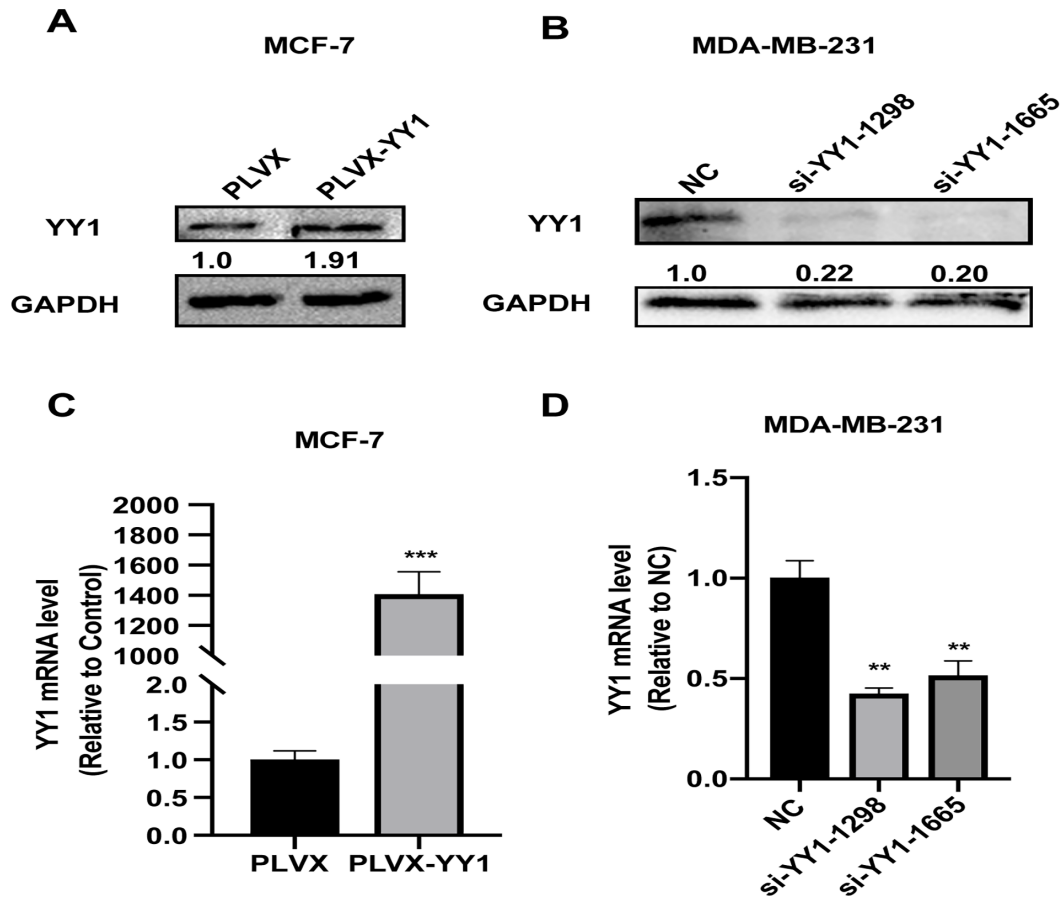

**Figure S3 Overexpression and knockdown efficiency of YY1 in MCF-7 and MDA-MB-231 cells.** (A-D) The overexpression and knockdown efficiency of YY1 was confirmed in MCF-7 cells with YY1 overexpression or MDA-MB-231 cells with YY1 knockdown by western blot (A and B) and qRT-PCR (C and D). Samples derive from the same experiment and that blots were processed in parallel. The data are presented as the mean  $\pm$  sd,  $n \geq 3$ , \* $p < 0.05$ , \*\* $p < 0.01$ , \*\*\* $p < 0.001$  vs PLVX or NC.

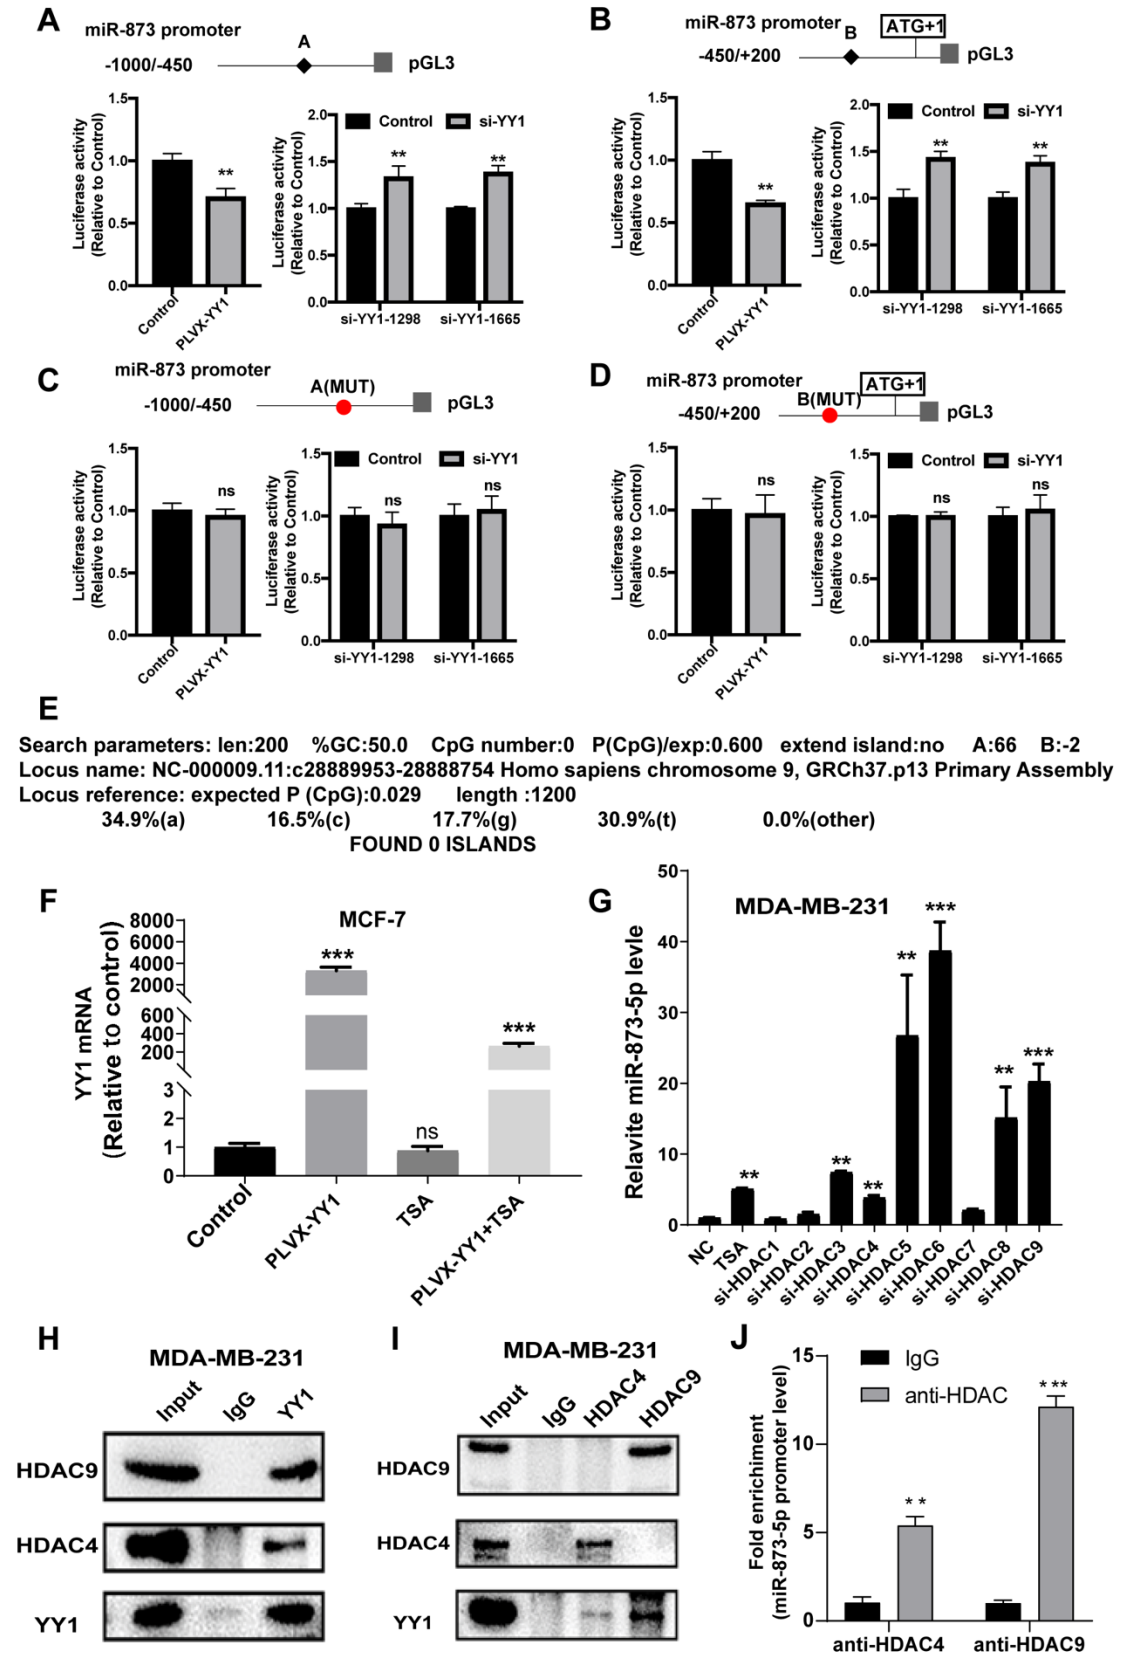

**Figure S4 YY1 regulated miR-873-5p expression by regulating the deacetylation level of miR-873-5p promoter. (A-D)** Relative luciferase activity of luciferase reporter plasmids (WT or MUT) and measured in HEK293T cells with YY1 overexpression or knockdown. **(E)** Software CpGfinder predicts

CpG islands situation in miR-873-5p promoter. **(F)** The mRNA level of YY1 detected via qRT-PCR in MCF-7 cells with different treatment. **(G)** miR-873-5p level was detected in MDA-MB-231 cells with TSA or si-HDAC 1-9, separately. MDA-MB-231 cell, followed by Co-immunoprecipitation **(Co-IP)** with anti-YY1, HDAC4, HDAC9, and rabbit IgG as control **(H-I)**. **(J)** ChIP assay was performed to detect the abundance of miR-873-5p promoter pulled down by Anti-HDAC4 and Anti-HDAC9. The data are presented as the mean  $\pm$  sd,  $n \geq 3$ , \* $p < 0.05$ , \*\* $p < 0.01$ , \*\*\* $p < 0.001$  vs PLVX or NC

**A**

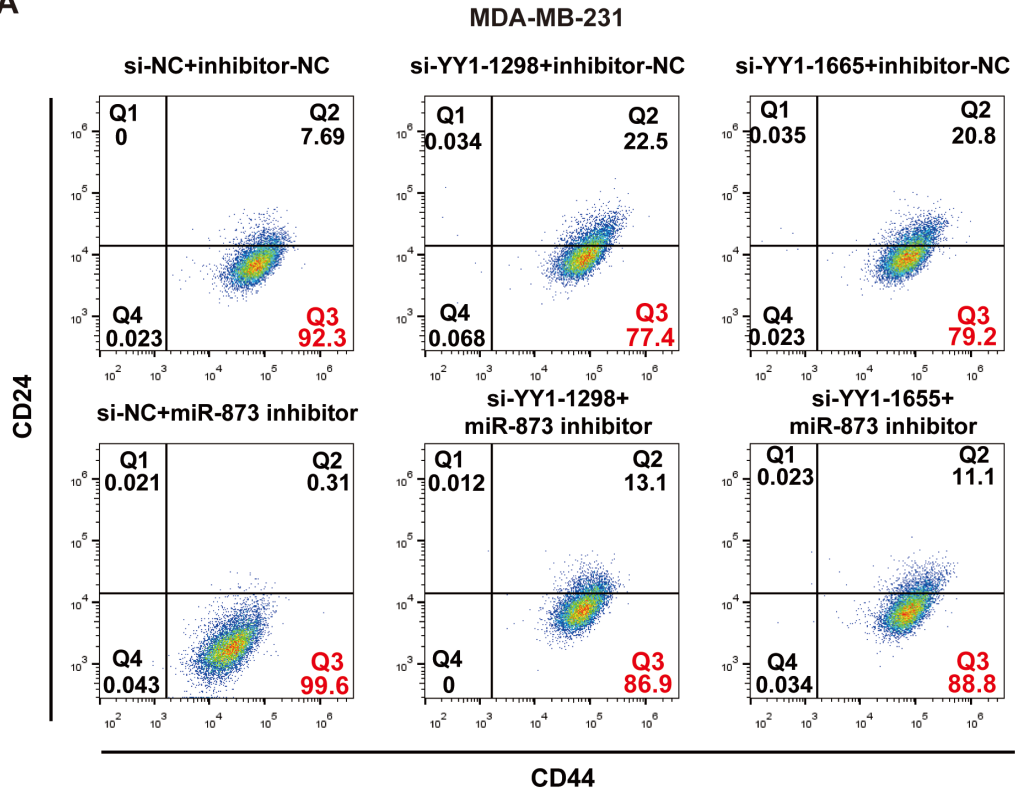

**B**

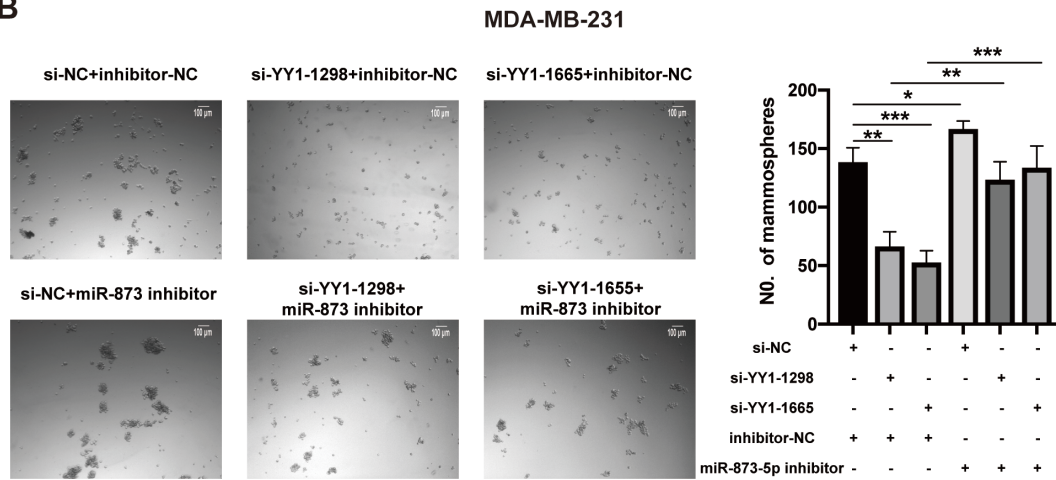

**Figure S5 YY1 regulated the stemness of breast cancer cells by regulating the level of miR-873-5p. (A and B) CD44<sup>+</sup>/CD24<sup>-</sup> population or spheroid formation (50X) was measured in cells with different treatment. The data are presented as the mean  $\pm$  sd,  $n \geq 3$ , \* $p < 0.05$ , \*\* $p < 0.01$ , vs PLVX or PLVX-YY1**



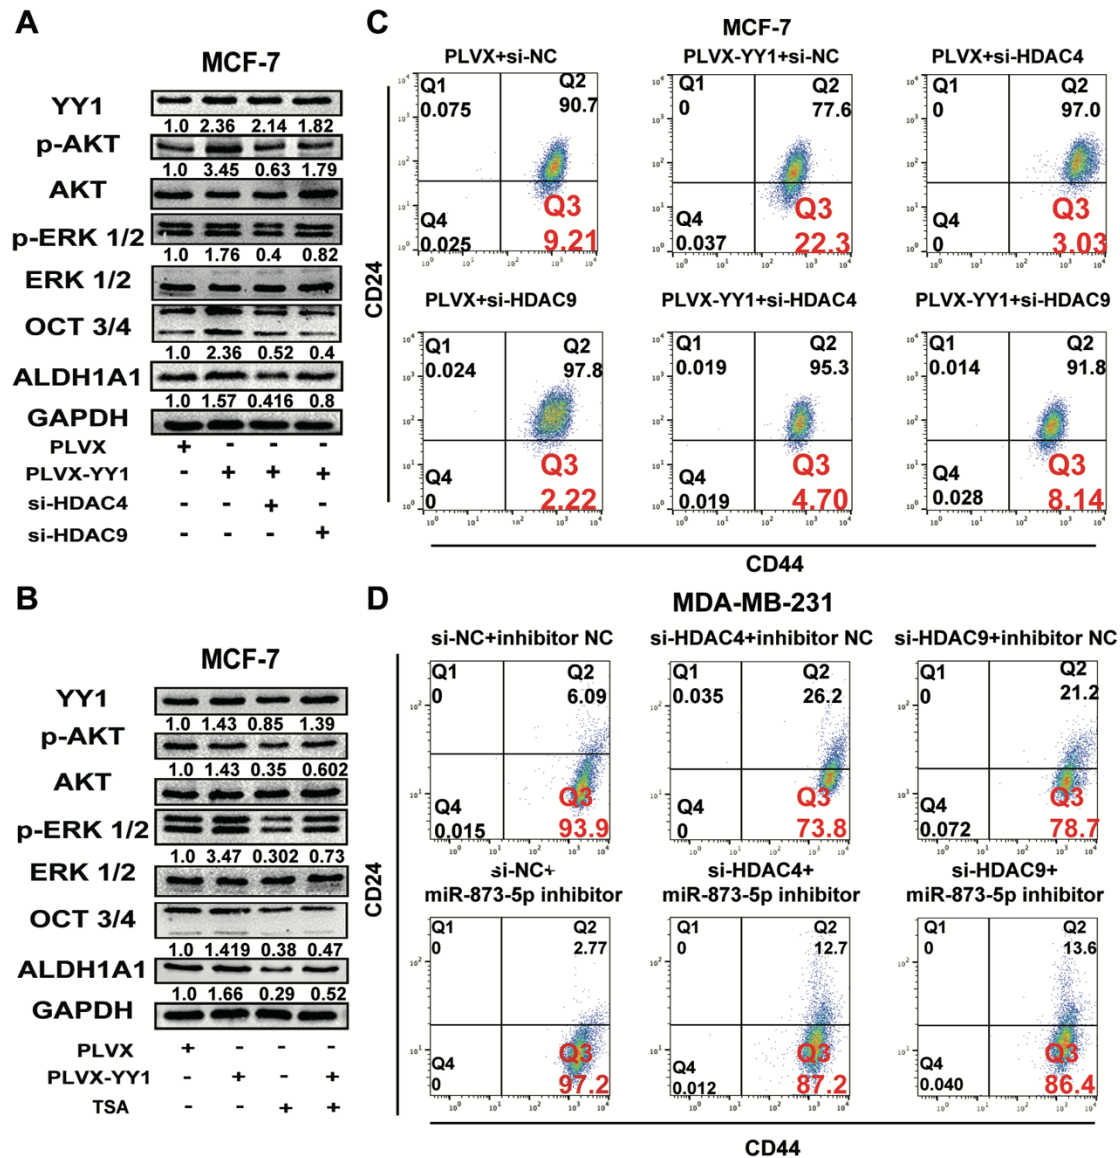

**Figure S6 HDAC knockdown reduced the stemness of breast cancer cells dependent on miR-873-5p.** (A and B) Expression of stemness markers (ALDH1A1 and OCT3/4), p-AKT and p-ERK1/2 was detected by western blot in MCF-7 cells with TSA (A) or HDAC siRNA (B). (C and D) CD44<sup>+</sup>/CD24<sup>-</sup> population was determined via flow cytometry analysis in MCF-7 cells and MDA-MB-231 cells with different treatment. Samples derive from the same experiment and that blots were processed in parallel. The data are presented as the mean  $\pm$  sd,  $n \geq 3$ , \* $p < 0.05$ , \*\* $p < 0.01$ , \*\*\* $p < 0.001$  vs PLVX or NC.

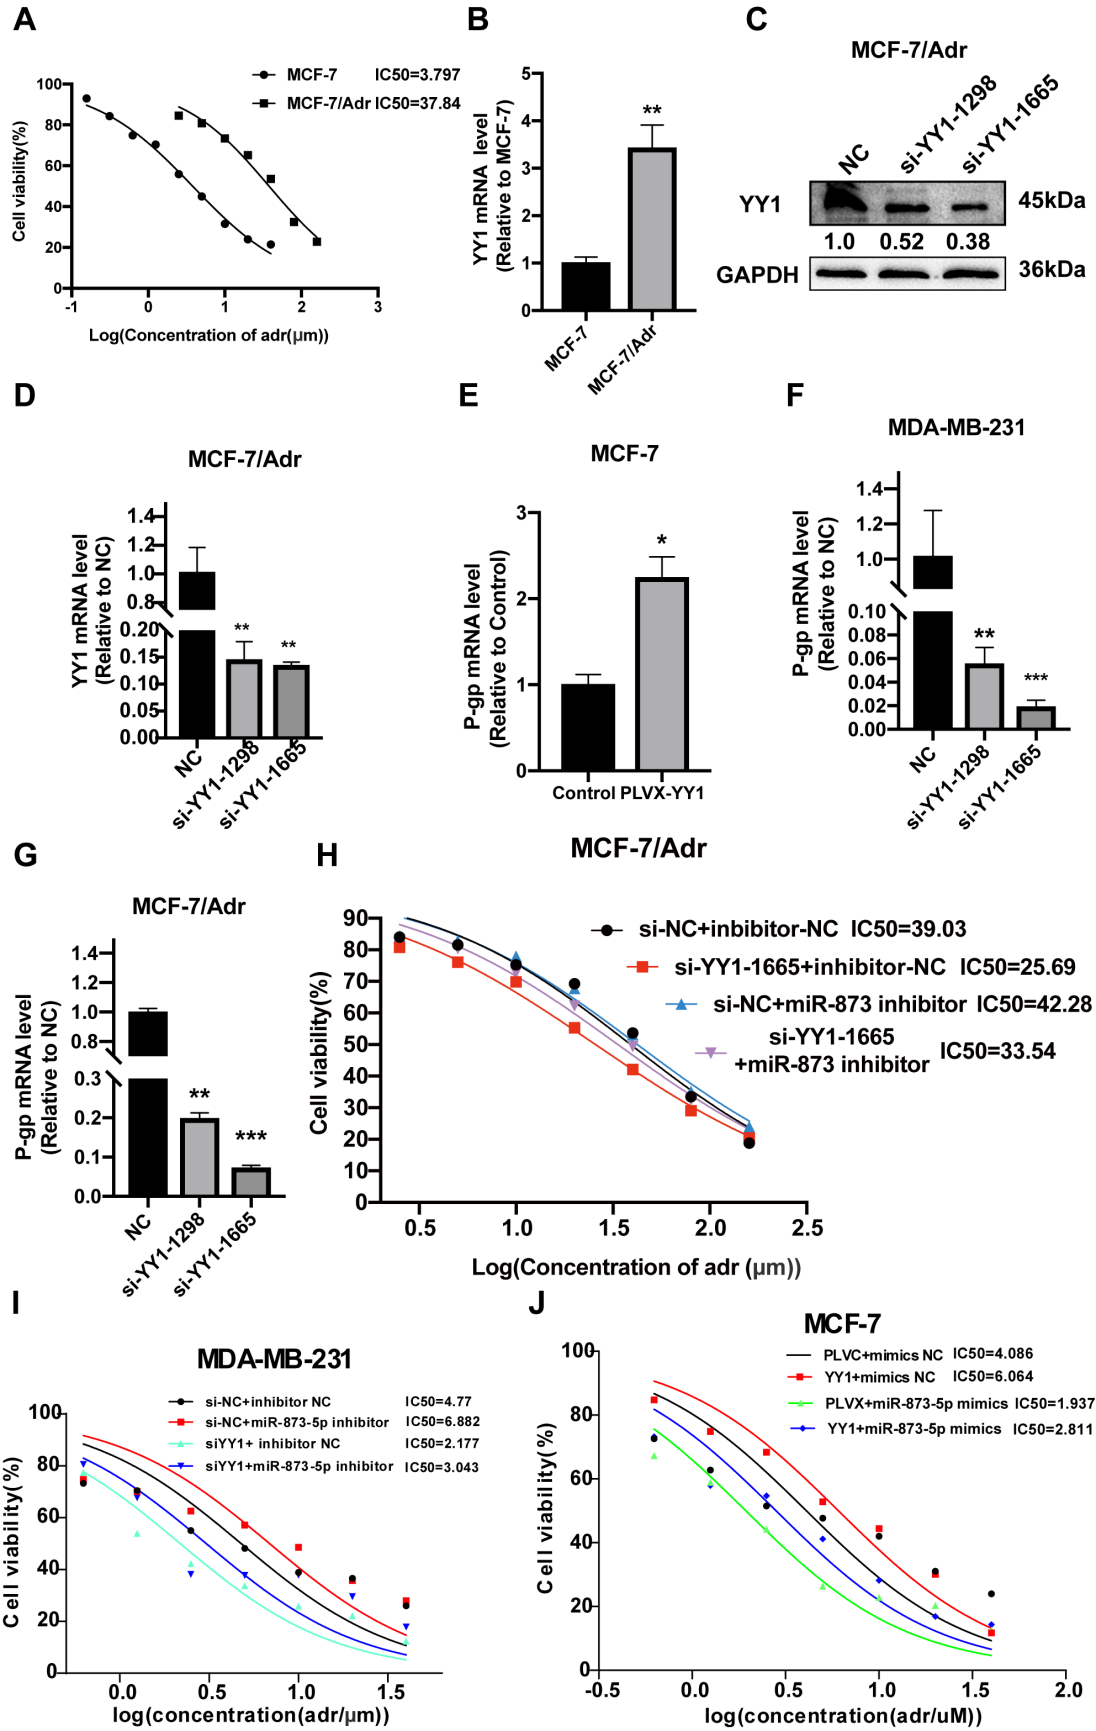

**Figure S7 YY1 knockdown attenuated adriamycin resistance dependent on miR-873-5p. (A)** IC50 values of adriamycin in MCF-7 and MCF-7/Adr cells. **(B)** YY1 expression was measured in MCF-

7 and MCF-7/Adr cells via qRT-PCR. **(C and D)** Knockdown efficiency of YY1 was confirmed in MCF-7/Adr cells by western blot and qRT-PCR assay. **(E)** PGP mRNA level was detected in MCF-7 cells with YY1 overexpression. **(F and G)** PGP mRNA level was examined in MDA-MB-231 and MCF/Adr cells with YY1 knockdown. **(H-J)** IC<sub>50</sub> values of adriamycin in MCF-7/Adr, MDA-MB-231 and MCF-7 cells with YY1 knockdown plus miR-873-5p inhibitor transfection or not. The data are presented as the mean  $\pm$  sd,  $n \geq 3$ , \* $p < 0.05$ , \*\* $p < 0.01$ , \*\*\* $p < 0.001$  vs PLVX or NC.

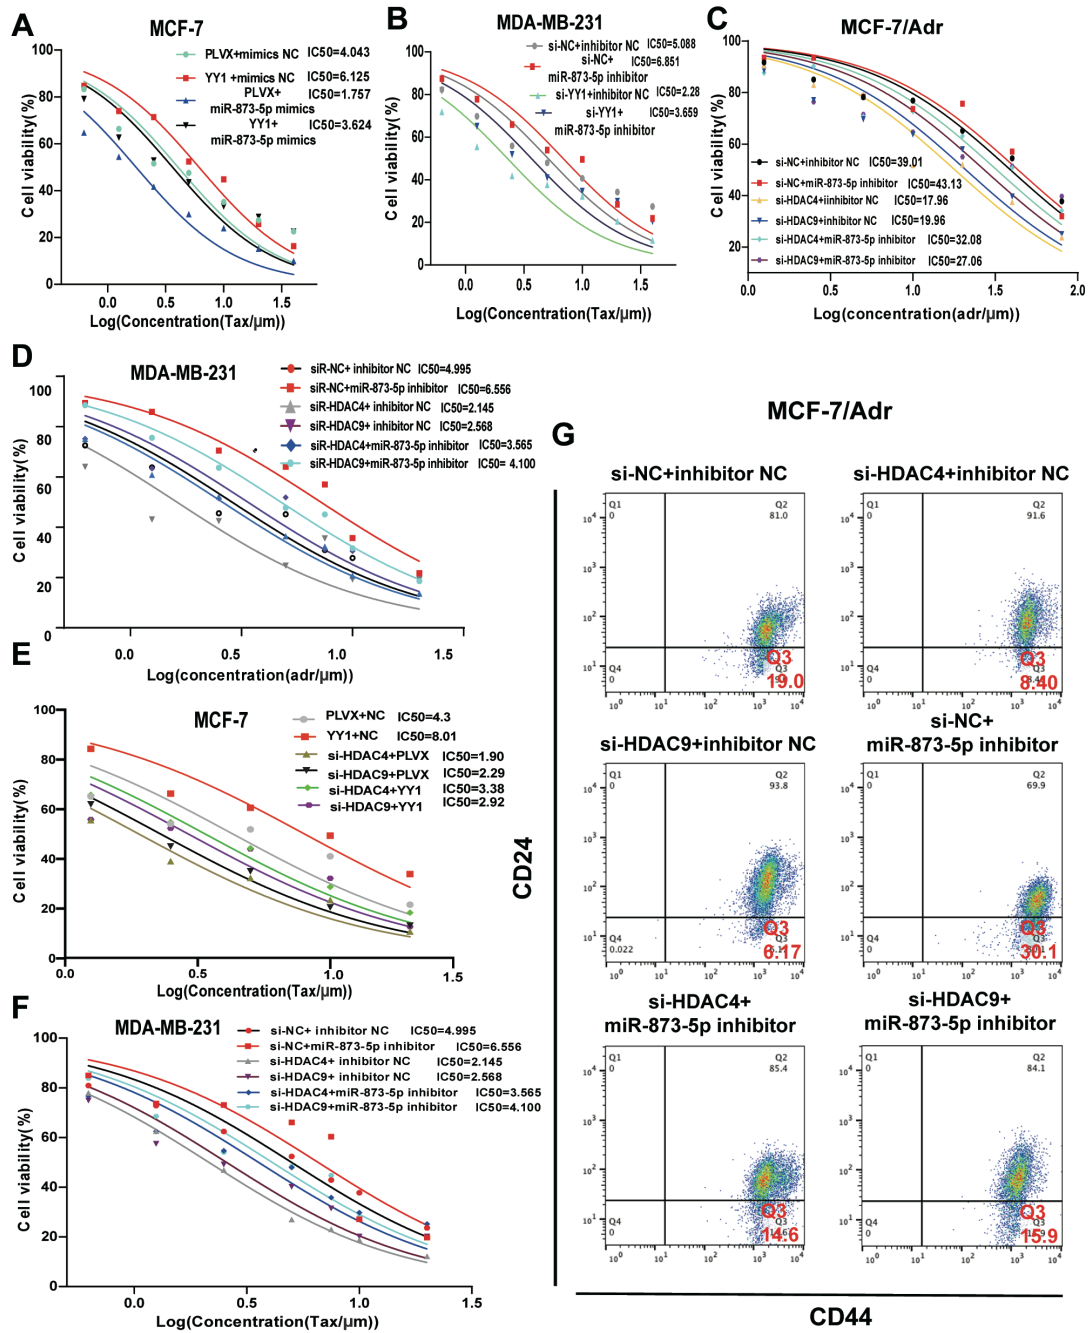

**Figure S8 YY1 confers chemotherapeutic resistance through miR-73-5p and HDAC4/9.** (A-B) IC50 values of taxol in MCF-7 and MDA-MB-231 cells with different treatment. (C-F) IC50 values of adriamycin in MCF-7, MDA-MB-231 and MCF-7/Adr cells with different treatment. (G) CD44<sup>+</sup>/CD24<sup>-</sup> population was measured in cells with different treatment. Samples derive from the same experiment and that blots were processed in parallel. The data are presented as the mean  $\pm$  sd,  $n \geq 3$ , \* $p < 0.05$ , \*\* $p < 0.01$ , \*\*\* $p < 0.001$  vs PLVX or NC.

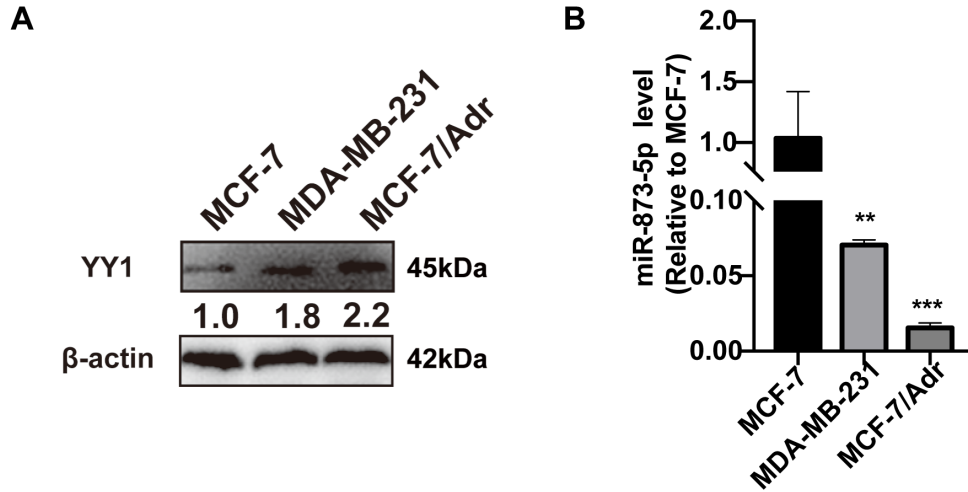

**Figure S9** The level of YY1 and miR-873-5p in different breast cancer cells. (A) YY1 level was detected by Western blot in MCF-7, MDA-MB-231 and MCF-7/Adr cells. (B) miR-873-5p level detected by qRT-PCR in MCF-7, MDA-MB-231 and MCF-7/Adr cells. The data are presented as the mean  $\pm$  sd,  $n \geq 3$ , \*\* $p < 0.01$ , \*\*\* $p < 0.001$  vs MCF-7.

**Supplemental Table 1. Sequences of primers used for siRNA and miRNA**

|                                  |                 |                               |
|----------------------------------|-----------------|-------------------------------|
| siR-YY1-1298                     | Forward (5'-3') | CCAAACAACUGGCAGAAUU           |
|                                  | Reverse (5'-3') | AAUUCUGCCAGUUGUUUGG           |
| siR-YY1-1665                     | Forward (5'-3') | UCAGUCAACUAACACUGAAA          |
|                                  | Reverse (5'-3') | UUUCAGUGUUAGUUGACUGA          |
| LV3-NC                           | Forward(5'-3')  | TTCTCCGAACGTGTCACGT           |
|                                  | Reverse (5'-3') | ACGTGACACGTTCGGAGAA           |
| LV3-has-miR-873-<br>5p mimics    | Forward (5'-3') | GCAGGAACTTGTGAGTCTCCT         |
|                                  | Reverse (5'-3') | AGGAGACTCACAAGTTCCTGC         |
| LV3-has-miR-873-<br>5p inhibitor | Forward (5'-3') | AGGAGACTCACAAGTTCCTGC         |
|                                  | Reverse (5'-3') | GCAGGAACTTGTGAGTCTCCT         |
| siR-HDAC1                        | Forward (5'-3') | CCCGGAGGAAAGUCUGUUA           |
|                                  | Reverse (5'-3') | UAACAGACUUUCCUCCGGG           |
| siR-HDAC2                        | Forward (5'-3') | CCCAUAACUUGCUGUUAAA           |
|                                  | Reverse (5'-3') | UUUAACAGCAAGUUAUGGG           |
| siR-HDAC3                        | Forward (5'-3') | CCUGCAUUACGGUCUCUAU           |
|                                  | Reverse (5'-3') | AUAGAGACCGUAAUGCAGG           |
| siR-HDAC4                        | Forward (5'-3') | CGACUCAUCUUGUAGCUUAUU         |
|                                  | Reverse (5'-3') | AAUAAGCUACAAGAUGAGUCG         |
| siR-HDAC5                        | Forward (5'-3') | CAUUGCCCACGAGUUCUCACCUGAU     |
|                                  | Reverse (5'-3') | AUCAGGUGAGAACUCGUGGGCAAUG     |
| siR-HDAC6                        | Forward (5'-3') | GCACCAUGGUCAAGGAACA           |
|                                  | Reverse (5'-3') | UGUUCCUUGACCAUGGUGC           |
| siR-HDAC7                        | Forward (5'-3') | AUCAGUUGCUGCGUCAUGUdTdT       |
|                                  | Reverse (5'-3') | ACAUGACGCAGCAACUGAUdTdT       |
| siR-HDAC8                        | Forward (5'-3') | CAUUCAGGAUGGCAUACAA           |
|                                  | Reverse (5'-3') | UUGUAUGCCAUCCUGAAUG           |
| siR-HDAC9                        | Forward (5'-3') | GCCAGUAGUCCUAGGUUAUUGUGUAdTdT |
|                                  | Reverse (5'-3') | UACACAAUAACCUAGGACUACUGGCdTdT |
| siR-NC                           | Forward (5'-3') | <b>UUCUCCGAACGUGUCACGU</b>    |
|                                  | Reverse (5'-3') | ACGUGACACGUUCGGAGAA           |

---

**Supplemental Table 2. Sequences of primers used for qRT-PCR in this study**

| <b>Name</b> |                 | <b>Sequences</b>          |
|-------------|-----------------|---------------------------|
| YY1         | Forward (5'-3') | AAGAGCGGCAAGAAGAGTTAC     |
|             | Reverse (5'-3') | CAACCACTGTCTCATGGTCAATA   |
| ALDH1       | Forward (5'-3') | AGCCTTCACAGGATCAACAGA     |
|             | Reverse (5'-3') | GTCGGCATCAGCTAACACAA      |
| Nanog       | Forward (5'-3') | GCAGGCAACTCACTTTATCC      |
|             | Reverse (5'-3') | CCCACAAATCACAGGCATAG      |
| OCT4        | Forward (5'-3') | AGCGATCAAGCAGCGACTA       |
|             | Reverse (5'-3') | GGAAAGGGACCGAGGAGTA       |
| Sox2        | Forward (5'-3') | CATCACCCACAGCAAATGAC      |
|             | Reverse (5'-3') | CAAAGCTCCTACCGTACCACT     |
| GAPDH       | Forward (5'-3') | CTTAGTTGCGTTACACCCTTTCTTG |
|             | Reverse (5'-3') | CTGTCACCTTCACCGTTCCAGTTT  |

**Supplemental Table 3. Sequences of primers used for Luciferase reporter assay**

| <b>Name</b>     |         | <b>Sequences</b>                     |
|-----------------|---------|--------------------------------------|
| PGL3-miR-873-5p | Forward | GGTACCGGAAAAAAGAAAAACAGGATGGTGC      |
| -promoter       | (5'-3') |                                      |
| (-1000/+200)    | Reverse | CTCGAGCATTTCAGATAAGCAGCTGTTCAT       |
|                 | (5'-3') |                                      |
| PGL3-miR-873-5p | Forward | GGGGTACCTTGAACAACTAACATAGGCAAAT      |
| -promoter       | (5'-3') |                                      |
| (-1000/-450)    | Reverse | CCGCTCGAGATAGCAGTATTTCCATGTCACACCA   |
|                 | (5'-3') |                                      |
| PGL3-miR-873-5p | Forward | GGGGTACCGAATTCTGATCTCGTAGTTCCTTT     |
| -promoter       | (5'-3') |                                      |
| (-450/+200)     | Reverse | CCGCTCGAGTTCATTTTCAATAGGAGACTCACAA   |
|                 | (5'-3') |                                      |
| PGL3-miR-873-5p | Forward | ACGGTGGTGGGGTAAAATAGCCCAAATAATAATTTT |
| -promoter A     | (5'-3') | TAAAATT                              |
| (MUT)           | Reverse | TATTTTCCCCACCACCGTGTGATGATGATATAATAA |
|                 | (5'-3') | CTGGAAACA                            |
| PGL3-miR-873-5p | Forward | TATTCACGGGACCTCCTTGAACAGCTGCTTATCTGC |
| -promoter B     | (5'-3') | AAATG                                |
| (MUT)           | Reverse | AAGGAGGTCCCGTGAATACAGTAATCTGTTCCCCTG |
|                 | (5'-3') | GA                                   |
